# Supplementary material
Source: Springer Nature journal article supplement (https://www.springermedizin.de/resource/supplementary/12889_2010_2730_MOESM1_ESM.pdf/9487434)
Supplement: MOESM1 [file 9487434]

**Recruit participants across 3 sites**

**Baseline Assessment**

**1-session of feedback and randomisation**

**Healthy Lifestyles Treatment**

**7 x weekly sessions of CBT + NRT  
3 x fortnightly sessions of CBT + NRT  
6 x monthly sessions of CBT + NRT**

**15-wk assessment (independent assessor)**

**12-, 18-, 24-, 30-, and 36-month  
assessments (independent assessor)**

**Control**

**7 x weekly phone check-in + NRT  
3 x fortnightly phone check-in + NRT  
6 x monthly phone check-in + NRT**

**15-wk assessment (independent assessor)**

**12-, 18-, 24-, 30-, and 36-month  
assessments (independent assessor)**
